# Supplementary material for: Electrochemical performance of a self-assembled two-dimensional heterostructure of rGO/MoS2/h-BN
Source: Royal Society of Chemistry journal article supplement (doi:10.1039/d0na00021c), 2020-01-01
Supplement: d0na00021c1.pdf [file d0na00021c1.pdf]

## Supplementary information

### Electrochemical performance of self-assembled two-dimensional heterostructure of rGO/MoS<sub>2</sub>/h-BN

Ashwini P. Alegaonkar <sup>a</sup>, Prashant S. Alegaonkar <sup>b,1</sup>, Satish K. Pardeshi <sup>a,\*\*</sup>

<sup>a</sup> Department of Chemistry, Savitribai Phule Pune University (Formerly University of Pune),  
Ganeshkhind, Pune 411 007, MS, India

<sup>b</sup> Department of Applied Physics, Defence Institute of Advance Technology, Girinagar, Pune 411 025,  
MS, India

#### 1. XRD pattern reduced Graphene oxide (rGO)

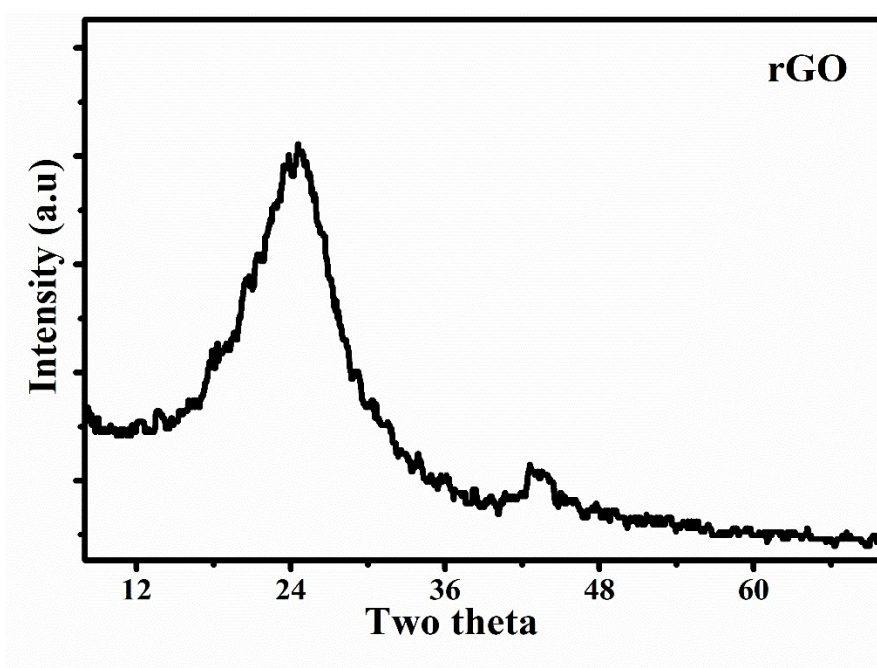

Figure S1: X-ray diffraction pattern of rGO

Figure S1 two well-resolved diffraction patterns for rGO  $\sim 24.6^\circ$  (0 0 2) and  $43.3^\circ$  (1 0 2) are shown with respective planes. The d spacing calculated is 0.73nm. The broad peak in

---

<sup>1</sup> Co-corresponding author (P. S. Alegaonkar) mail: [prashantalegaonkar@diat.ac.in](mailto:prashantalegaonkar@diat.ac.in)

\*\*Corresponding author (S.K. Pardeshi) mail: [skpar@chem.unipune.ac.in](mailto:skpar@chem.unipune.ac.in)

these samples correspond to few layers of rGO sheets in the particles. One small peak at 43.3 indicating the presence of multilayer domains along with few mono-layered rGO sheets.

## 2. XRD pattern of hexagonal boron nitride (h-BN)

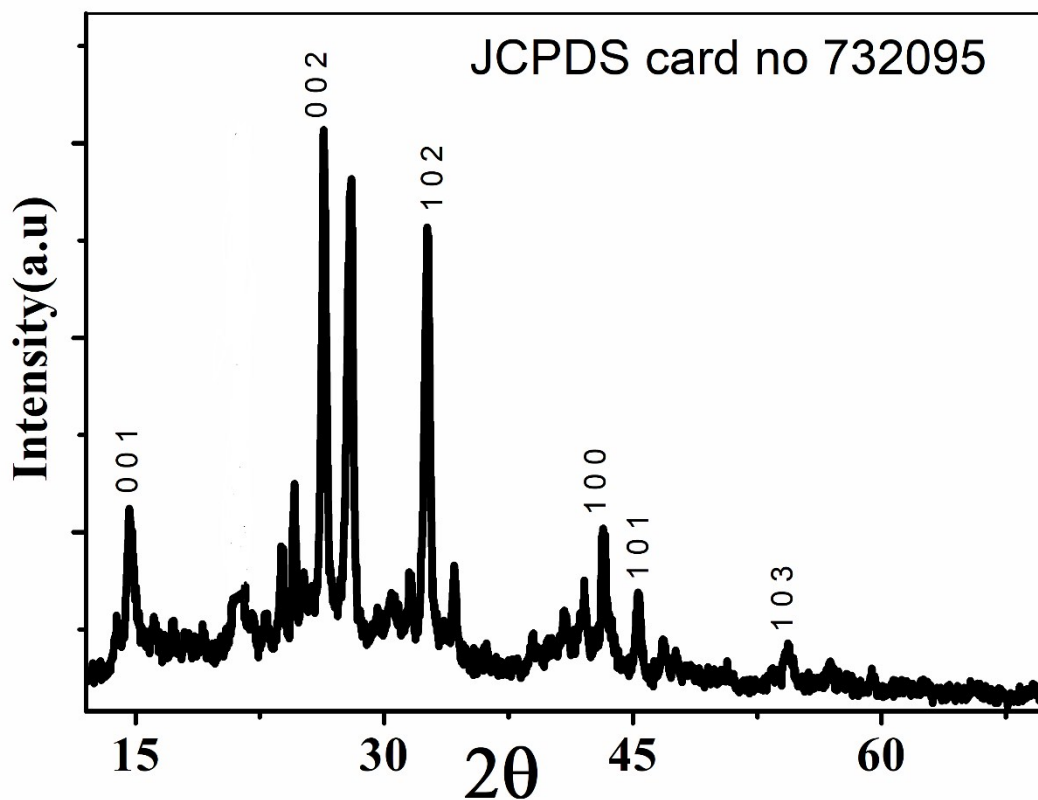

Figure S2: XRD pattern of h-BN.

All reflections can be indexed to hexagonal form boron nitride. The most intense peak at  $2\theta$  value 27 is due to the (002) plane of hexagonal boron nitride. The d spacing calculated is 0.33nm with respect to this plane. While the second most intense peak at  $2\theta$  values 13 is due to the (001) plane. The other peaks  $\sim 21$  and 28 assigned for residual  $B_2O_3$  and are not observed in case of composite.

### 3. XRD pattern of hexagonal boron nitride MoS<sub>2</sub>

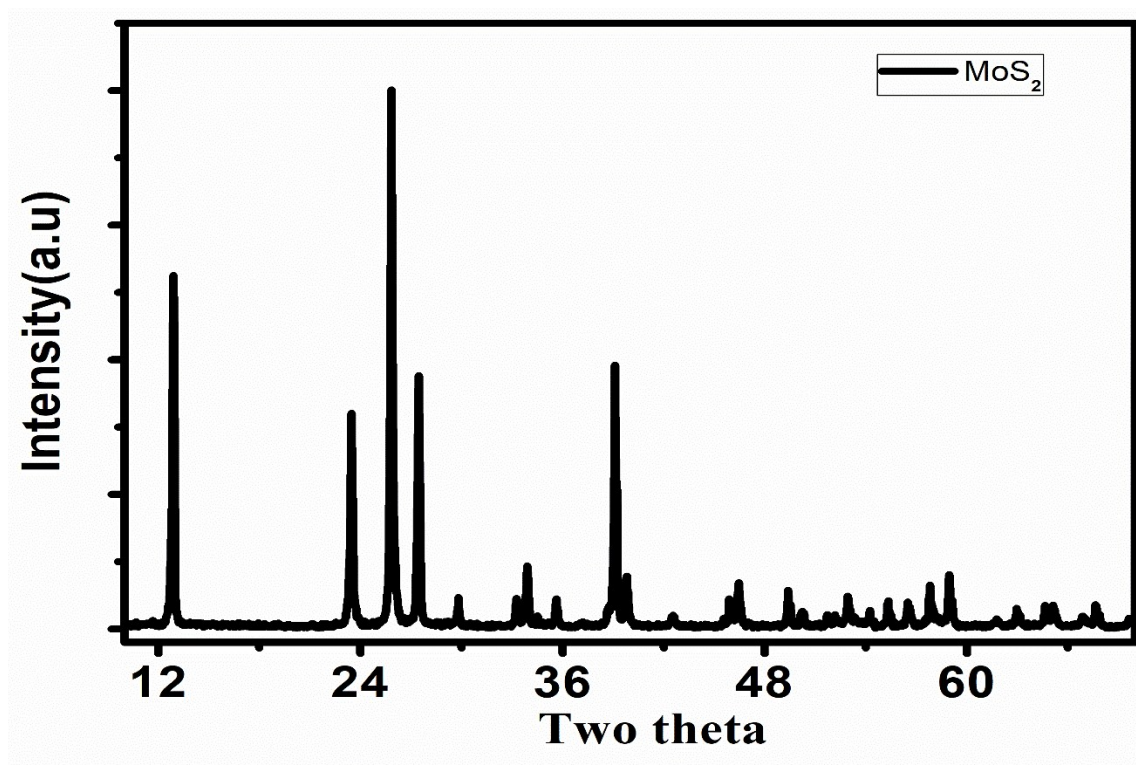

Figure S3: X-ray diffraction pattern of MoS<sub>2</sub>

XRD patterns of MoS<sub>2</sub> is shown in Fig. S3. The  $2\theta$  at 14.4°, 25.8°, 39.13°, 59° corresponding to (002), (100), (103), (1 0 5) and (1 1 0) of the 2H-MoS<sub>2</sub> (JCPDS card No. 37-1492) respectively. It signifies the presence of MoS<sub>2</sub> and the resemblances separated MoS<sub>2</sub> layers. The interlayer space is calculated to be 0.11 nm according to the  $2\theta=14.4$  (0 0 2 plane) of MoS<sub>2</sub>. The peak at  $2\theta \sim 27.5^\circ$  is correspond to MoO<sub>3</sub>.
